# Supplementary material for: The implications of changing education distributions for life expectancy gradients
Source: PubMed Central journal article supplement — Soc Sci Med. Author manuscript; Available in PMC 2022 Mar 1. (PMC7969123; doi:10.1016/j.socscimed.2021.113712), 2021-01-23
Supplement: NIHMS1673422-supplement-Supplementary_Appendix_A.pdf [file NIHMS1673422-supplement-Supplementary_Appendix_A.pdf]

**Appendix Figure 1.** Education Distribution by Occupation Category, Finnish Men, 1971-1975 and 1996-2000

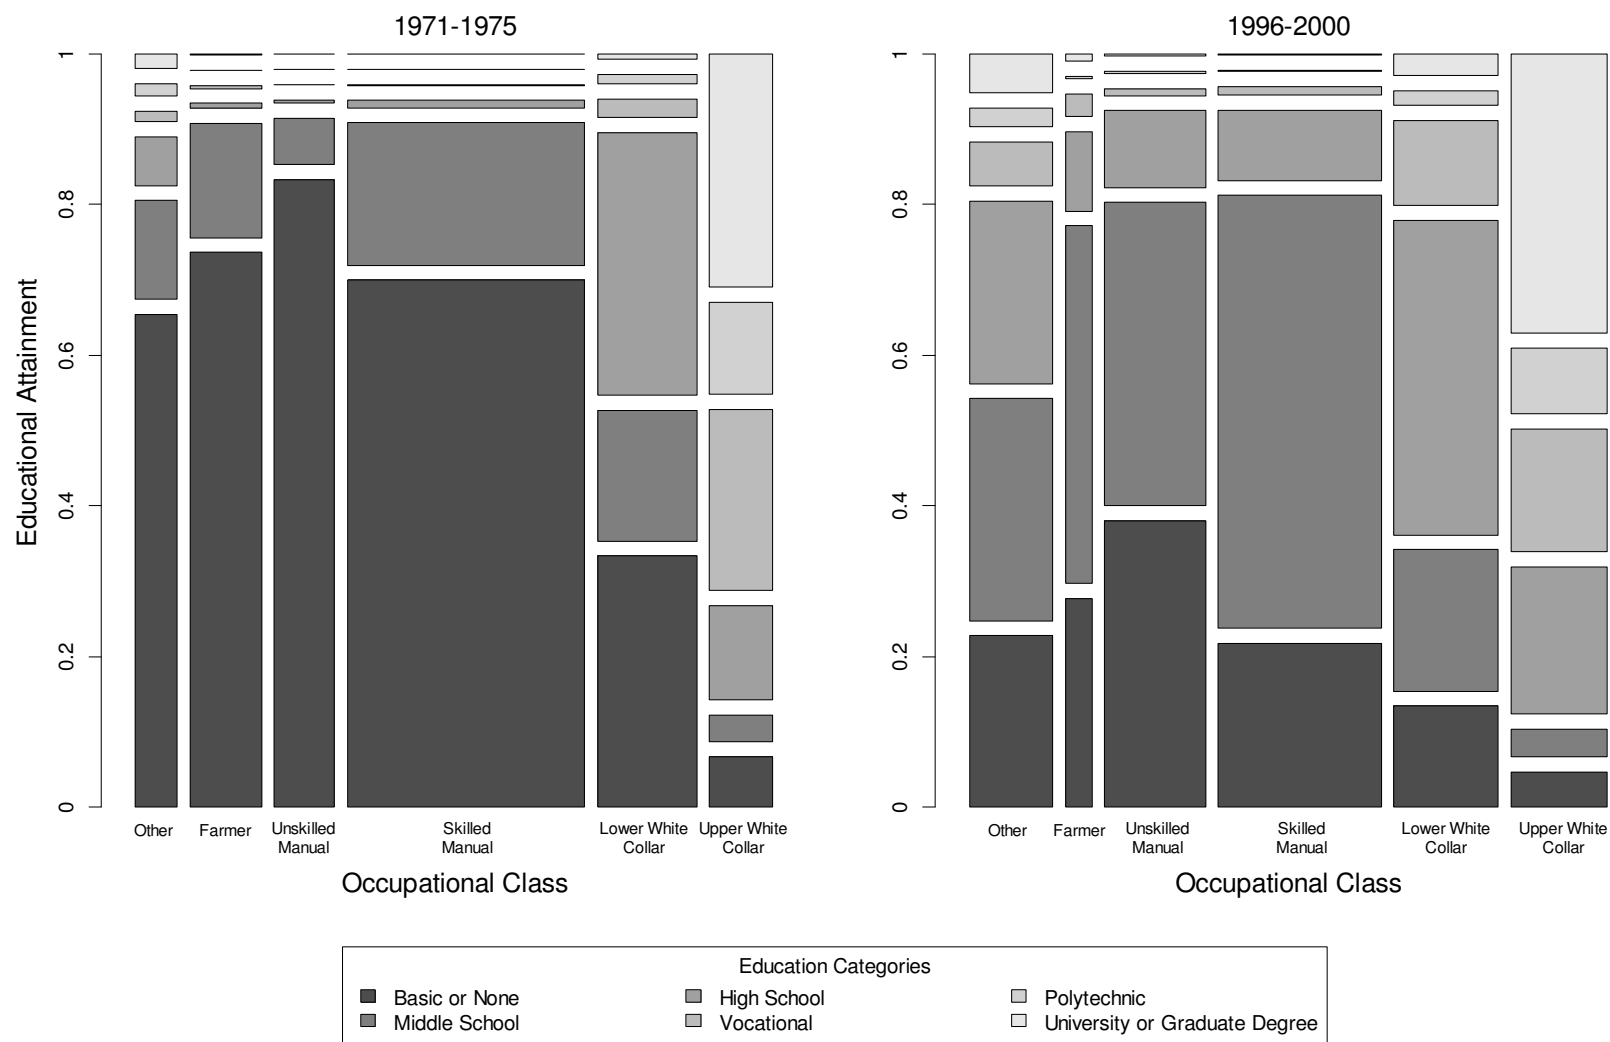

*Source:* Authors' calculations based on Finnish census data.

*Note:* The left axis shows the relative frequency of education groups within a given occupation. The areas of the blocks are proportional to the total size of the occupation-education group.

**Appendix Figure 2.** Percent Difference in Mortality Between the Least and Most Educated by Age and Year, Males, Finland 1971-2010

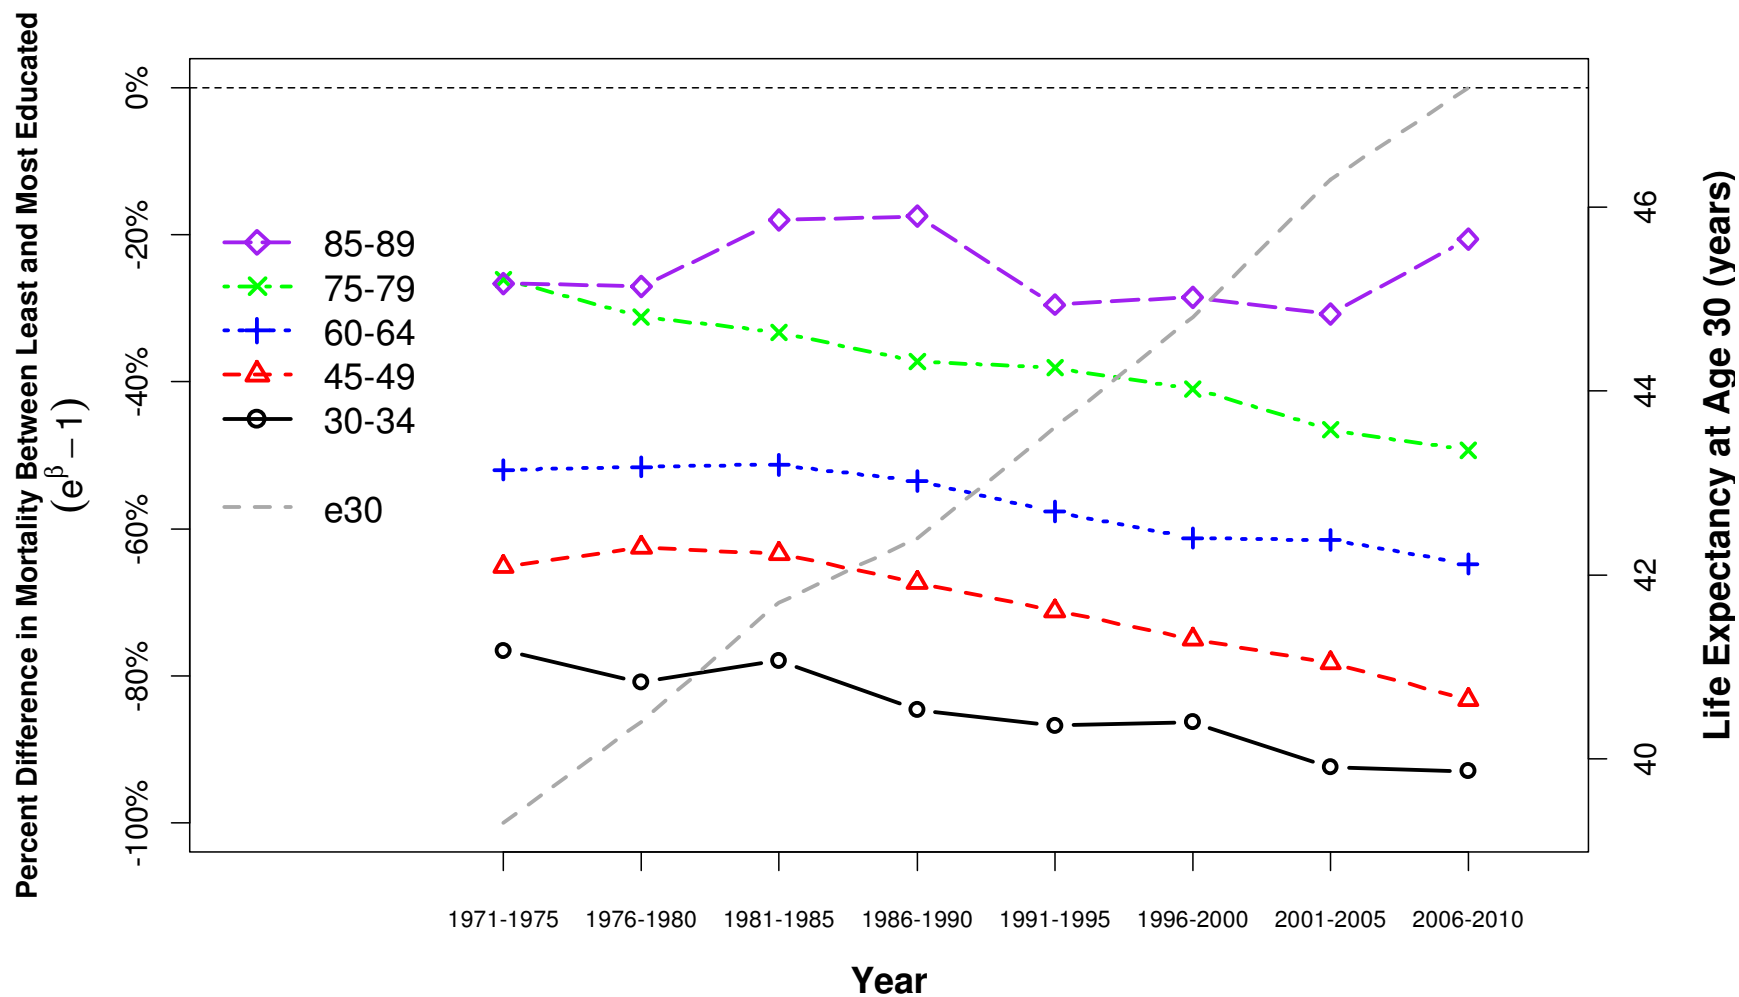

Source: Authors' calculations based on Finnish registry data and censuses.

Note: Values are estimated on the basis of regressions described in the text.

**Appendix Figure 3.** Percent Difference in Mortality Between the Least and Most Educated by Age and Year, Females, Finland 1971-2010

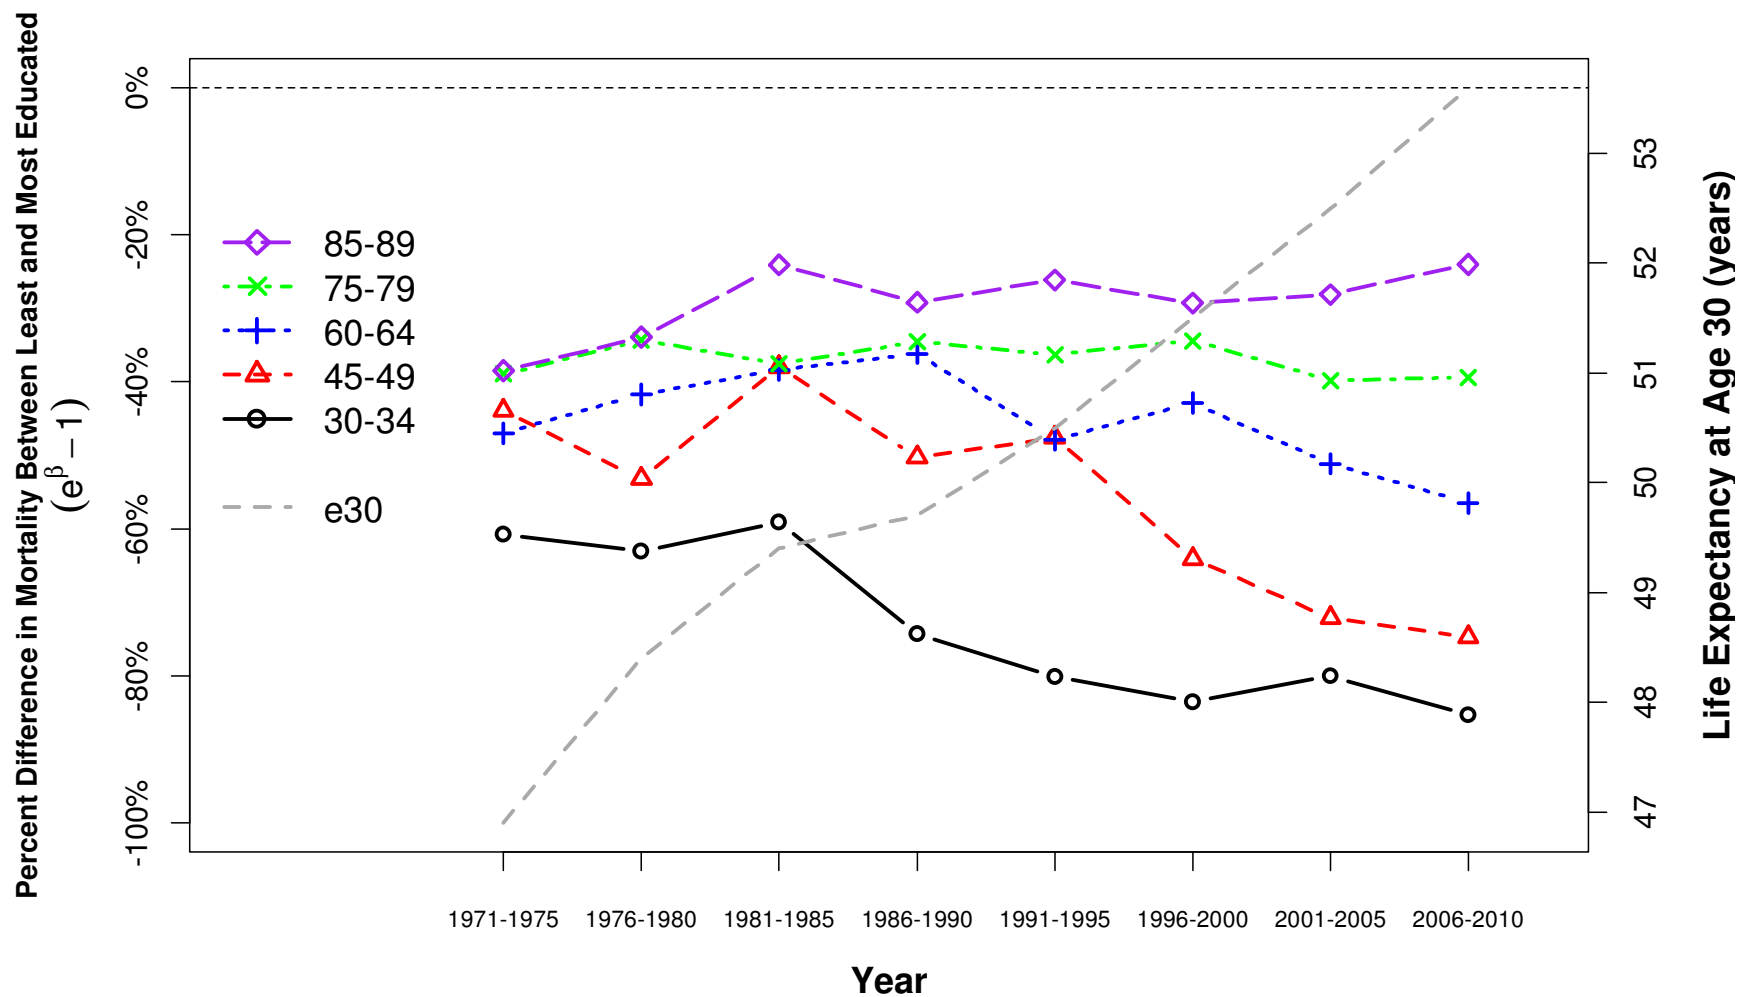

Source: Authors' calculations based on Finnish registry data and censuses.

Note: Values are estimated on the basis of regressions described in the text.

**Appendix Figure 4.** Ratio of Mortality among the Least Educated (0<sup>th</sup> percentile) to Overall Mortality by Age and Year, Males, Finland 1971-2010

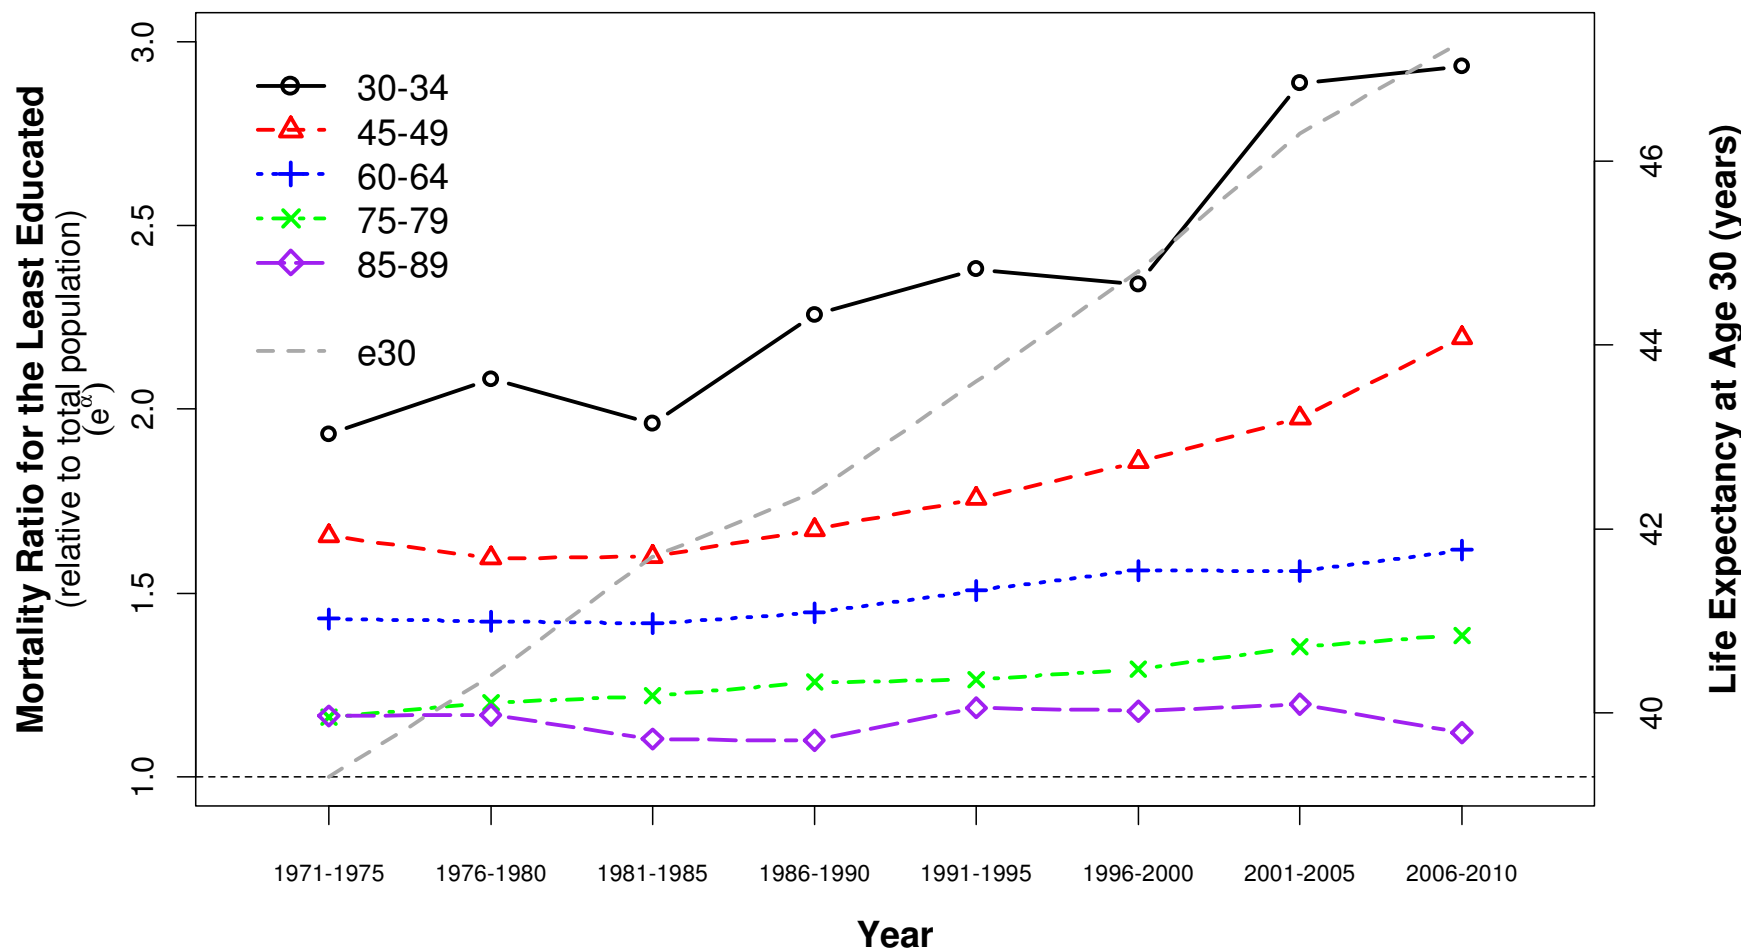

Source: Authors' calculations based on Finnish registry data and censuses.

Note: Values are estimated on the basis of regressions described in the text.

**Appendix Figure 5.** Ratio of Mortality among the Least Educated (0<sup>th</sup> percentile) to Overall Mortality by Age and Year, Females, Finland 1971-2010

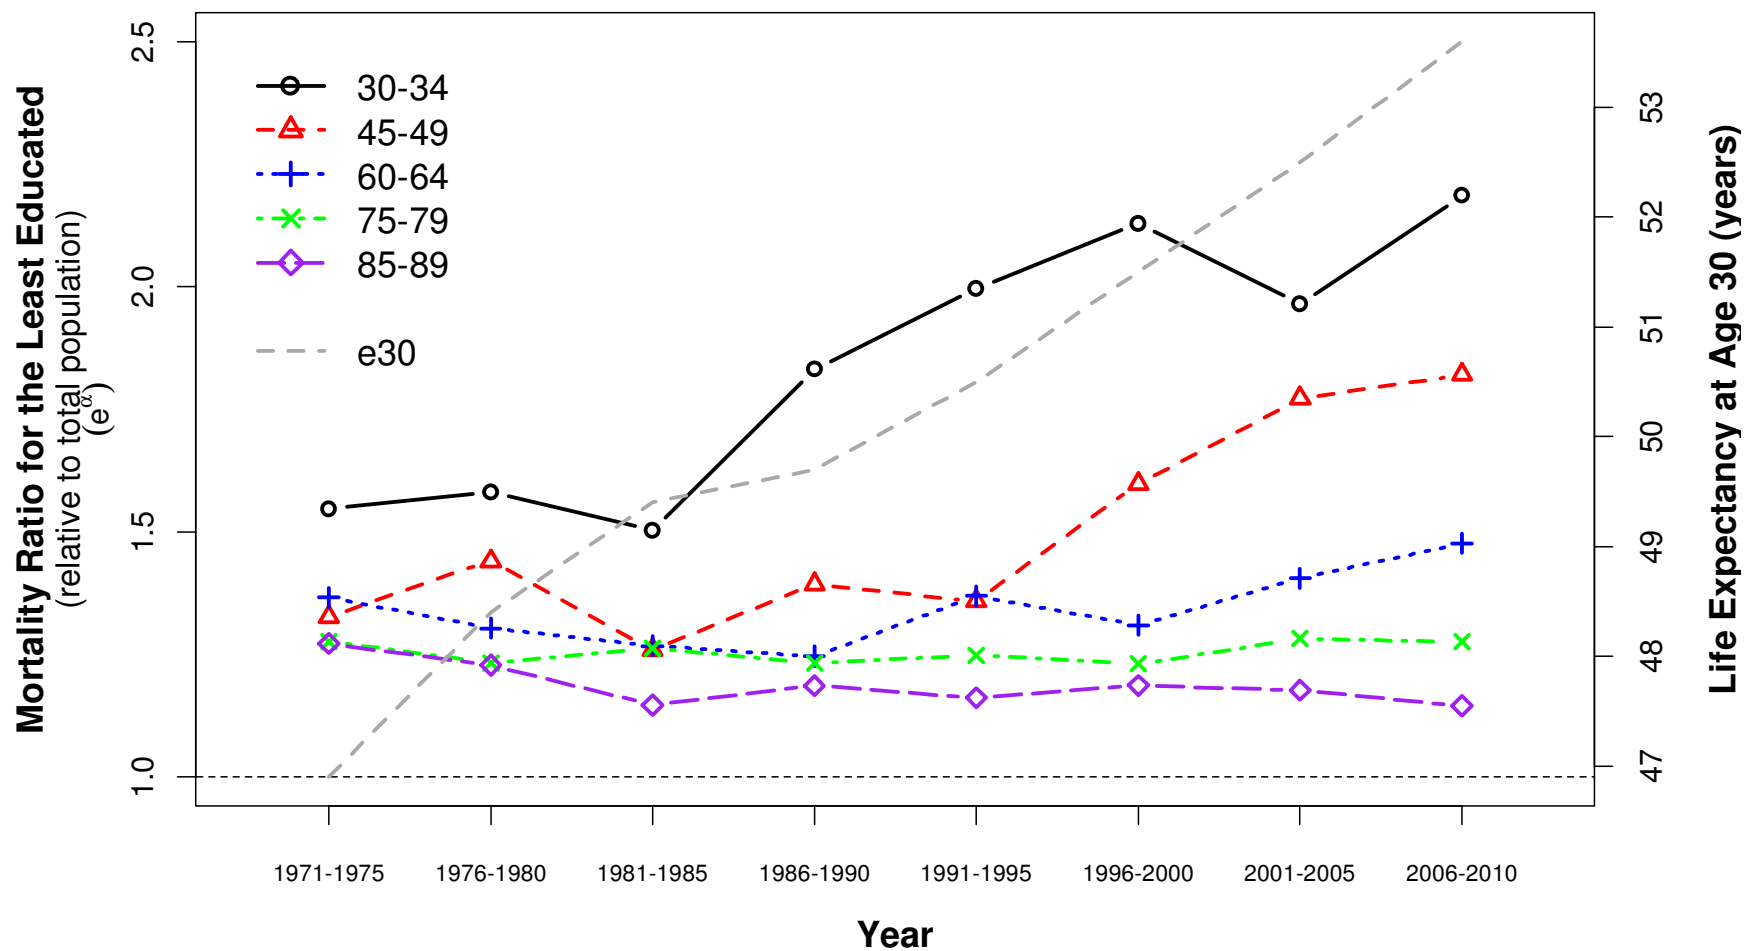

Source: Authors' calculations based on Finnish registry data and censuses.

Note: Values are estimated on the basis of regressions described in the text.
